# Supplementary material
Source: publisher figshare collection journal article supplement (https://acs.figshare.com/ndownloader/files/3801322)
Supplement: Supplementary file 1 [file 3801322]

 
data_1 
 
_audit_creation_method            SHELXL-97 
_chemical_name_systematic 
; 
 ? 
; 
_chemical_name_common             ? 
_chemical_melting_point           ? 
_chemical_formula_moiety          '(4/3)C96 H135 N9 O21,(4/3)C H6 N3 Cl, C3 H7 N O'  
_chemical_formula_sum 
 'C397 H585 Cl12 N51 O87' 
_chemical_formula_weight          7889.62 
 
loop_ 
 _atom_type_symbol 
 _atom_type_description 
 _atom_type_scat_dispersion_real 
 _atom_type_scat_dispersion_imag 
 _atom_type_scat_source 
 'C'  'C'   0.0033   0.0016 
 'International Tables Vol C Tables 4.2.6.8 and 6.1.1.4' 
 'H'  'H'   0.0000   0.0000 
 'International Tables Vol C Tables 4.2.6.8 and 6.1.1.4' 
 'N'  'N'   0.0061   0.0033 
 'International Tables Vol C Tables 4.2.6.8 and 6.1.1.4' 
 'O'  'O'   0.0106   0.0060 
 'International Tables Vol C Tables 4.2.6.8 and 6.1.1.4' 
 'Cl'  'Cl'   0.1484   0.1585 
 'International Tables Vol C Tables 4.2.6.8 and 6.1.1.4' 
 
_symmetry_cell_setting            Trigonal 
_symmetry_space_group_name_H-M    'R3' 
 
loop_ 
 _symmetry_equiv_pos_as_xyz 
 'x, y, z' 
 '-y, x-y, z' 
 '-x+y, -x, z' 
 'x+2/3, y+1/3, z+1/3' 
 '-y+2/3, x-y+1/3, z+1/3' 
 '-x+y+2/3, -x+1/3, z+1/3' 
 'x+1/3, y+2/3, z+2/3' 
 '-y+1/3, x-y+2/3, z+2/3' 
 '-x+y+1/3, -x+2/3, z+2/3' 
 
_cell_length_a                    26.577(2) 
_cell_length_b                    26.577(2) 
_cell_length_c                    59.934(4) 
_cell_angle_alpha                 90.00 
_cell_angle_beta                  90.00 
_cell_angle_gamma                 120.00 
_cell_volume                      36661(4) 
_cell_formula_units_Z             3 
_cell_measurement_temperature     110 
_cell_measurement_reflns_used     ? 
_cell_measurement_theta_min       ? 
_cell_measurement_theta_max       ? 
 
_exptl_crystal_description        block 
_exptl_crystal_colour             colorless 
_exptl_crystal_size_max           0.75 
_exptl_crystal_size_mid           0.70 
_exptl_crystal_size_min           0.63 
_exptl_crystal_density_meas       ? 
_exptl_crystal_density_diffrn     1.068 
_exptl_crystal_density_method     'not measured' 
_exptl_crystal_F_000              12591 
_exptl_absorpt_coefficient_mu     0.138 
_exptl_absorpt_correction_type    none 
_exptl_absorpt_correction_T_min   ? 
_exptl_absorpt_correction_T_max   ? 
_exptl_absorpt_process_details    ? 
 
_exptl_special_details 
; 
 ? 
; 
 
_diffrn_ambient_temperature       110(2) 
_diffrn_radiation_wavelength      0.71073 
_diffrn_radiation_type            MoK\a 
_diffrn_radiation_source          'fine-focus sealed tube' 
_diffrn_radiation_monochromator   graphite 
_diffrn_measurement_device_type   'CCD area detector' 
_diffrn_measurement_method        'phi and omega scans' 
_diffrn_detector_area_resol_mean  ? 
_diffrn_standards_number          ? 
_diffrn_standards_interval_count  ? 
_diffrn_standards_interval_time   ? 
_diffrn_standards_decay_%         ? 
_diffrn_reflns_number             72734 
_diffrn_reflns_av_R_equivalents   0.0589 
_diffrn_reflns_av_sigmaI/netI     0.1124 
_diffrn_reflns_limit_h_min        -33 
_diffrn_reflns_limit_h_max        28 
_diffrn_reflns_limit_k_min        -34 
_diffrn_reflns_limit_k_max        33 
_diffrn_reflns_limit_l_min        -78 
_diffrn_reflns_limit_l_max        47 
_diffrn_reflns_theta_min          2.23 
_diffrn_reflns_theta_max          27.69 
_reflns_number_total              31850 
_reflns_number_gt                 11818 
_reflns_threshold_expression      >2sigma(I) 
 
_computing_data_collection        'Bruker SMART' 
_computing_cell_refinement        'Bruker SMART' 
_computing_data_reduction         'Bruker SAINT' 
_computing_structure_solution     'SHELXS-97 (Sheldrick, 1990)' 
_computing_structure_refinement   'SHELXL-97 (Sheldrick, 1997)' 
_computing_molecular_graphics     'Bruker SHELXTL' 
_computing_publication_material   'Bruker SHELXTL'
 
_refine_special_details 
; 
 Refinement of F^2^ against ALL reflections.  The weighted R-factor wR and 
 goodness of fit S are based on F^2^, conventional R-factors R are based 
 on F, with F set to zero for negative F^2^. The threshold expression of 
 F^2^ > 2sigma(F^2^) is used only for calculating R-factors(gt) etc. and is 
 not relevant to the choice of reflections for refinement.  R-factors based 
 on F^2^ are statistically about twice as large as those based on F, and R- 
 factors based on ALL data will be even larger. 

The co-crystals of 1c and guanidinium chloride are inherently not very good beside the large unit cell. A few data sets were collected with different samples and the data set submitted is the best obtained. The disorder is observed mainly with the side chains, including the disorder of several terminal methyl ester groups and an isoamyl group. Although ISOR and DFIX restraints were applied to help the refinement, certain unresolved disorder remains with the terminal groups of the alkyl side chains.
; 
 
_refine_ls_structure_factor_coef  Fsqd  
_refine_ls_matrix_type            full 
_refine_ls_weighting_scheme       calc  
_refine_ls_weighting_details 
 'calc w=1/[\s^2^(Fo^2^)+(0.2000P)^2^+0.0000P] where P=(Fo^2^+2Fc^2^)/3' 
_atom_sites_solution_primary      direct 
_atom_sites_solution_secondary    difmap 
_atom_sites_solution_hydrogens    geom 
_refine_ls_hydrogen_treatment     mixed 
_refine_ls_extinction_method      none 
_refine_ls_extinction_coef        ? 
_refine_ls_abs_structure_details 
 'Flack H D (1983), Acta Cryst. A39, 876-881' 
_refine_ls_abs_structure_Flack    0.61(17) 
_refine_ls_number_reflns          31850 
_refine_ls_number_parameters      1621 
_refine_ls_number_restraints      115 
_refine_ls_R_factor_all           0.2234 
_refine_ls_R_factor_gt            0.1138 
_refine_ls_wR_factor_ref          0.3461 
_refine_ls_wR_factor_gt           0.2938 
_refine_ls_goodness_of_fit_ref    0.927 
_refine_ls_restrained_S_all       0.934 
_refine_ls_shift/su_max           0 
_refine_ls_shift/su_mean          0.136 
 
loop_ 
 _atom_site_label 
 _atom_site_type_symbol 
 _atom_site_fract_x 
 _atom_site_fract_y 
 _atom_site_fract_z 
 _atom_site_U_iso_or_equiv 
 _atom_site_adp_type 
 _atom_site_occupancy 
 _atom_site_symmetry_multiplicity 
 _atom_site_calc_flag 
 _atom_site_refinement_flags 
 _atom_site_disorder_assembly 
 _atom_site_disorder_group 
C10 C 1.3215(6) 1.3686(7) -0.1602(2) 0.144(6) Uani 1 1 d . . . 
H10K H 1.3626 1.3828 -0.1605 0.215 Uiso 1 1 calc R . . 
H10L H 1.3145 1.4001 -0.1630 0.215 Uiso 1 1 calc R . . 
H10M H 1.3028 1.3394 -0.1715 0.215 Uiso 1 1 calc R . . 
C12 C 1.37191(19) 1.17395(15) -0.08166(8) 0.0473(18) Uani 1 1 d G . . 
C33 C 1.4309(2) 1.19655(19) -0.08563(9) 0.059(2) Uani 1 1 d G . . 
C44 C 1.46652(15) 1.2557(2) -0.08940(9) 0.072(3) Uani 1 1 d G . . 
H44A H 1.5060 1.2708 -0.0921 0.086 Uiso 1 1 calc R . . 
C24 C 1.44320(17) 1.29231(15) -0.08919(8) 0.0446(17) Uani 1 1 d G . . 
C2 C 1.38424(18) 1.26972(18) -0.08521(7) 0.0434(17) Uani 1 1 d G . . 
C106 C 1.34859(14) 1.21054(19) -0.08144(8) 0.0440(17) Uani 1 1 d G . . 
H11N H 1.3091 1.1954 -0.0788 0.053 Uiso 1 1 calc R . . 
C4 C 1.51307(17) 1.45677(14) -0.08874(7) 0.0353(15) Uani 1 1 d G . . 
C38 C 1.57306(18) 1.48085(17) -0.08925(7) 0.0405(16) Uani 1 1 d G . . 
H38A H 1.5891 1.4573 -0.0919 0.049 Uiso 1 1 calc R . . 
C5 C 1.60907(14) 1.54012(18) -0.08581(8) 0.0380(16) Uani 1 1 d G . . 
C116 C 1.58510(18) 1.57531(14) -0.08188(9) 0.057(2) Uani 1 1 d G . . 
C16 C 1.52511(19) 1.55123(19) -0.08137(10) 0.067(2) Uani 1 1 d G . . 
C34 C 1.48909(14) 1.4920(2) -0.08481(9) 0.067(2) Uani 1 1 d G . . 
C15 C 0.7565(3) 1.1455(4) -0.14502(13) 0.066(2) Uani 1 1 d . . . 
H15D H 0.7754 1.1687 -0.1581 0.079 Uiso 1 1 calc R . . 
H15E H 0.7617 1.1715 -0.1328 0.079 Uiso 1 1 calc R . . 
C17 C 1.22673(18) 1.2783(2) -0.24855(8) 0.060(2) Uani 1 1 d G . . 
C130 C 1.1873(2) 1.2191(2) -0.24732(9) 0.064(2) Uani 1 1 d G . . 
C37 C 1.1285(2) 1.19950(17) -0.24443(9) 0.060(2) Uani 1 1 d G . . 
H37A H 1.1021 1.1599 -0.2436 0.073 Uiso 1 1 calc R . . 
C96 C 1.10907(18) 1.2392(2) -0.24278(9) 0.063(2) Uani 1 1 d G . . 
C3 C 1.1485(2) 1.2984(2) -0.24401(8) 0.0460(17) Uani 1 1 d G . . 
C53 C 1.2073(2) 1.31797(18) -0.24690(7) 0.061(2) Uani 1 1 d G . . 
H53A H 1.2337 1.3576 -0.2477 0.073 Uiso 1 1 calc R . . 
C1 C 0.95419(17) 1.2140(2) -0.24549(8) 0.0444(17) Uani 1 1 d G . . 
C67 C 0.9326(2) 1.25199(16) -0.24667(9) 0.063(2) Uani 1 1 d G . . 
C23 C 0.8731(2) 1.2303(2) -0.24869(9) 0.067(2) Uani 1 1 d G . . 
C118 C 0.83531(17) 1.1707(2) -0.24954(8) 0.0515(19) Uani 1 1 d G . . 
C13 C 0.8569(2) 1.13272(16) -0.24837(8) 0.052(2) Uani 1 1 d G . . 
C48 C 0.9164(2) 1.1544(2) -0.24635(8) 0.057(2) Uani 1 1 d G . . 
H48A H 0.9308 1.1290 -0.2456 0.068 Uiso 1 1 calc R . . 
C21 C 0.87531(19) 1.19609(18) -0.13628(8) 0.0438(17) Uani 1 1 d G . . 
H21A H 0.8607 1.2208 -0.1391 0.053 Uiso 1 1 calc R . . 
C92 C 0.83805(14) 1.13631(19) -0.13575(9) 0.0509(19) Uani 1 1 d G . . 
C19 C 0.85992(18) 1.09942(14) -0.13158(10) 0.061(2) Uani 1 1 d G . . 
C70 C 0.91906(19) 1.12229(18) -0.12792(10) 0.057(2) Uani 1 1 d G . . 
H70A H 0.9337 1.0976 -0.1251 0.068 Uiso 1 1 calc R . . 
C18 C 0.95632(14) 1.1821(2) -0.12845(9) 0.058(2) Uani 1 1 d G . . 
C125 C 0.93445(18) 1.21896(14) -0.13262(8) 0.0478(17) Uani 1 1 d G . . 
C82 C 1.12257(16) 1.2771(2) -0.12754(9) 0.059(2) Uani 1 1 d G . . 
C7 C 1.1466(2) 1.24110(15) -0.12712(9) 0.0519(19) Uani 1 1 d G . . 
H7A H 1.1232 1.2016 -0.1242 0.062 Uiso 1 1 calc R . . 
C77 C 1.2057(2) 1.26414(19) -0.13099(9) 0.058(2) Uani 1 1 d G . . 
C8 C 1.24071(16) 1.3231(2) -0.13529(9) 0.057(2) Uani 1 1 d G . . 
C6 C 1.2167(2) 1.35910(15) -0.13570(9) 0.062(2) Uani 1 1 d G . . 
C14 C 1.1576(2) 1.33606(19) -0.13183(8) 0.0454(17) Uani 1 1 d G . . 
C25 C 1.0438(4) 1.2099(4) -0.23890(12) 0.055(2) Uani 1 1 d . . . 
C29 C 1.2764(3) 1.0911(3) -0.07220(13) 0.0530(19) Uani 1 1 d . . . 
H29A H 1.2560 1.0990 -0.0839 0.064 Uiso 1 1 calc R . . 
H29B H 1.2736 1.1088 -0.0585 0.064 Uiso 1 1 calc R . . 
C31 C 1.4370(4) 1.5010(4) 0.02608(15) 0.070(2) Uani 1 1 d . . . 
H31A H 1.4525 1.5264 0.0132 0.084 Uiso 1 1 calc R . . 
H31B H 1.4482 1.5245 0.0395 0.084 Uiso 1 1 calc R . . 
C32 C 1.5150(3) 1.4788(4) 0.02774(13) 0.064(2) Uani 1 1 d . . . 
C35 C 1.4863(3) 1.3531(3) -0.09359(11) 0.0459(18) Uani 1 1 d . . . 
C36 C 1.5547(3) 1.5381(3) 0.02932(13) 0.059(2) Uani 1 1 d . . . 
H36A H 1.5414 1.5645 0.0291 0.071 Uiso 1 1 calc R . . 
C39 C 1.3704(4) 1.4626(5) 0.02447(18) 0.100(3) Uani 1 1 d . . . 
H39A H 1.3603 1.4451 0.0098 0.119 Uiso 1 1 calc R . . 
H39B H 1.3574 1.4315 0.0353 0.119 Uiso 1 1 calc R . . 
C43 C 1.3077(3) 1.2898(3) -0.07603(15) 0.063(2) Uani 1 1 d . . . 
H43A H 1.3044 1.2751 -0.0610 0.076 Uiso 1 1 calc R . . 
H43B H 1.2786 1.2590 -0.0853 0.076 Uiso 1 1 calc R . . 
C45 C 1.6146(3) 1.5586(3) 0.03122(11) 0.053(2) Uani 1 1 d . . . 
C46 C 0.8274(5) 1.0280(5) -0.25065(19) 0.104(4) Uani 1 1 d . . . 
C49 C 1.8789(4) 1.5030(4) 0.02355(17) 0.082(3) Uani 1 1 d . . . 
C51 C 1.0049(4) 1.3759(3) -0.14132(13) 0.060(2) Uani 1 1 d . . . 
H51A H 1.0211 1.3861 -0.1264 0.073 Uiso 1 1 calc R . . 
H51B H 1.0342 1.3754 -0.1509 0.073 Uiso 1 1 calc R . . 
C52 C 1.1857(5) 1.0120(4) -0.03536(15) 0.107(4) Uani 1 1 d . . . 
H52A H 1.1460 0.9934 -0.0304 0.161 Uiso 1 1 calc R . . 
H52B H 1.2030 1.0533 -0.0338 0.161 Uiso 1 1 calc R . . 
H52C H 1.2067 0.9986 -0.0265 0.161 Uiso 1 1 calc R . . 
C55 C 1.1639(4) 1.3957(4) -0.24377(15) 0.077(3) Uani 1 1 d . . . 
H55A H 1.1857 1.4053 -0.2576 0.092 Uiso 1 1 calc R . . 
H55B H 1.1912 1.4075 -0.2315 0.092 Uiso 1 1 calc R . . 
C56 C 1.9375(4) 1.7553(4) 0.03831(15) 0.069(2) Uani 1 1 d D . . 
C57 C 1.2529(3) 1.4238(3) -0.13881(16) 0.065(2) Uani 1 1 d D . . 
C58 C 1.9055(3) 1.4666(3) 0.02592(11) 0.0451(17) Uani 1 1 d . . . 
C59 C 1.5932(4) 1.4617(3) 0.02804(13) 0.077(3) Uani 1 1 d . . . 
H59A H 1.6062 1.4351 0.0277 0.093 Uiso 1 1 calc R . . 
C60 C 1.3286(5) 1.3533(5) -0.25066(17) 0.096(3) Uani 1 1 d . . . 
H60A H 1.3141 1.3771 -0.2571 0.115 Uiso 1 1 calc R . . 
H60B H 1.3604 1.3576 -0.2599 0.115 Uiso 1 1 calc R . . 
C62 C 1.2357(3) 1.3260(3) -0.06596(12) 0.0453(17) Uani 1 1 d . . . 
H62A H 1.2062 1.2932 -0.0746 0.054 Uiso 1 1 calc R . . 
C64 C 1.2512(3) 1.0278(3) -0.06923(14) 0.059(2) Uani 1 1 d D . . 
H64A H 1.2749 1.0210 -0.0587 0.071 Uiso 1 1 calc R . . 
H64B H 1.2526 1.0108 -0.0834 0.071 Uiso 1 1 calc R . . 
C68 C 1.6209(5) 1.6562(4) -0.05749(18) 0.105(4) Uani 1 1 d . . . 
H68A H 1.6501 1.6965 -0.0565 0.158 Uiso 1 1 calc R . . 
H68B H 1.6277 1.6347 -0.0462 0.158 Uiso 1 1 calc R . . 
H68C H 1.5833 1.6521 -0.0553 0.158 Uiso 1 1 calc R . . 
C69 C 0.9933(4) 1.4194(3) -0.14904(14) 0.068(2) Uani 1 1 d . . . 
H69A H 0.9620 1.4187 -0.1401 0.081 Uiso 1 1 calc R . . 
O30 O 0.8455(3) 1.2826(3) -0.27307(11) 0.0873(19) Uani 1 1 d . . . 
C73 C 0.6924(3) 1.1053(4) -0.14953(14) 0.067(2) Uani 1 1 d . . . 
H73A H 0.6744 1.0815 -0.1365 0.081 Uiso 1 1 calc R . . 
H73B H 0.6879 1.0797 -0.1618 0.081 Uiso 1 1 calc R . . 
C74 C 1.2697(4) 1.5038(3) -0.16584(17) 0.105(4) Uani 1 1 d D . . 
H74A H 1.2833 1.5276 -0.1523 0.127 Uiso 1 1 calc R . . 
C75 C 1.1878(3) 0.9966(3) -0.06078(15) 0.080(3) Uani 1 1 d D . . 
H75A H 1.1647 1.0083 -0.0698 0.095 Uiso 1 1 calc R . . 
C76 C 1.6359(3) 1.5201(3) 0.03061(11) 0.0505(19) Uani 1 1 d . . . 
C79 C 1.0213(3) 1.1986(4) -0.12263(15) 0.065(2) Uani 1 1 d . . . 
O14 O 1.4955(3) 1.6167(3) -0.09443(17) 0.115(3) Uani 1 1 d . . . 
C84 C 1.1692(5) 1.4958(5) -0.24300(19) 0.104(3) Uani 1 1 d . . . 
H84A H 1.2040 1.5097 -0.2338 0.125 Uiso 1 1 calc R . . 
C86 C 0.8503(4) 1.2731(3) -0.25251(14) 0.062(2) Uani 1 1 d . . . 
C87 C 0.9829(5) 1.3355(4) -0.22346(16) 0.097(4) Uani 1 1 d . . . 
H87A H 1.0095 1.3766 -0.2238 0.146 Uiso 1 1 calc R . . 
H87B H 0.9996 1.3167 -0.2151 0.146 Uiso 1 1 calc R . . 
H87C H 0.9472 1.3281 -0.2165 0.146 Uiso 1 1 calc R . . 
C90 C 0.9530(3) 1.3161(3) -0.14074(11) 0.0395(15) Uani 1 1 d . . . 
H90A H 0.9242 1.3148 -0.1305 0.047 Uiso 1 1 calc R . . 
H90B H 0.9356 1.3052 -0.1554 0.047 Uiso 1 1 calc R . . 
C93 C 0.6605(3) 1.1405(4) -0.15544(14) 0.068(2) Uani 1 1 d . . . 
H93A H 0.6702 1.1707 -0.1441 0.082 Uiso 1 1 calc R . . 
C95 C 1.2289(4) 1.3080(4) -0.04346(14) 0.070(2) Uani 1 1 d . . . 
H95A H 1.2339 1.2747 -0.0422 0.104 Uiso 1 1 calc R . . 
H95B H 1.1907 1.2980 -0.0384 0.104 Uiso 1 1 calc R . . 
H95C H 1.2575 1.3391 -0.0345 0.104 Uiso 1 1 calc R . . 
C97 C 1.1320(4) 1.4260(4) -0.24256(17) 0.088(3) Uani 1 1 d . . . 
H97A H 1.1093 1.4142 -0.2289 0.106 Uiso 1 1 calc R . . 
H97B H 1.1049 1.4133 -0.2549 0.106 Uiso 1 1 calc R . . 
C98 C 1.80098(15) 1.6105(2) 0.03249(8) 0.0514(19) Uani 1 1 d G . . 
C9 C 1.8380(2) 1.67036(18) 0.03282(8) 0.060(2) Uani 1 1 d G . . 
C110 C 1.89780(19) 1.69319(14) 0.03156(8) 0.0462(17) Uani 1 1 d G . . 
C28 C 1.92048(15) 1.6562(2) 0.02995(8) 0.0454(18) Uani 1 1 d G . . 
C40 C 1.8834(2) 1.59638(19) 0.02962(8) 0.055(2) Uani 1 1 d G . . 
C30 C 1.82367(18) 1.57355(14) 0.03089(8) 0.0448(17) Uani 1 1 d G . . 
H30A H 1.7989 1.5335 0.0307 0.054 Uiso 1 1 calc R . . 
C100 C 0.6787(5) 1.1678(5) -0.17712(16) 0.102(3) Uani 1 1 d . . . 
H10N H 0.7197 1.1953 -0.1768 0.153 Uiso 1 1 calc R . . 
H10O H 0.6578 1.1875 -0.1807 0.153 Uiso 1 1 calc R . . 
H10P H 0.6709 1.1387 -0.1882 0.153 Uiso 1 1 calc R . . 
N6 N 1.9606(4) 1.7921(3) 0.01943(15) 0.120(4) Uani 1 1 d D . . 
H6A H 1.9565 1.7788 0.0061 0.144 Uiso 1 1 calc R . . 
C105 C 0.7461(4) 1.1460(5) -0.23234(17) 0.096(3) Uani 1 1 d . . . 
H10A H 0.7053 1.1291 -0.2353 0.145 Uiso 1 1 calc R . . 
H10B H 0.7612 1.1849 -0.2269 0.145 Uiso 1 1 calc R . . 
H10C H 0.7519 1.1231 -0.2214 0.145 Uiso 1 1 calc R . . 
C112 C 0.9757(4) 1.4114(4) -0.17504(15) 0.085(3) Uani 1 1 d . . . 
H11C H 0.9678 1.4414 -0.1796 0.127 Uiso 1 1 calc R . . 
H11D H 0.9417 1.3741 -0.1773 0.127 Uiso 1 1 calc R . . 
H11E H 1.0072 1.4138 -0.1838 0.127 Uiso 1 1 calc R . . 
C113 C 1.4975(5) 1.5902(4) -0.0783(3) 0.099(4) Uani 1 1 d . . . 
C114 C 1.6363(5) 1.6600(3) 0.03197(18) 0.090(3) Uani 1 1 d . . . 
H11B H 1.6029 1.6535 0.0410 0.108 Uiso 1 1 calc R . . 
C85 C 1.6367(6) 1.6766(5) 0.01081(19) 0.043(3) Uani 0.50 1 d PD . . 
C85' C 1.6816(9) 1.7142(8) 0.0319(5) 0.133(9) Uani 0.50 1 d P . . 
C10' C 1.6697(11) 1.7675(11) 0.0147(13) 0.29(4) Uani 0.50 1 d P . . 
C103 C 1.6211(7) 1.7251(6) 0.0101(2) 0.062(5) Uani 0.50 1 d PD . . 
C135 C 1.6365(9) 1.7590(7) -0.0117(2) 0.171(7) Uani 1 1 d D . . 
H13B H 1.6184 1.7818 -0.0153 0.206 Uiso 1 1 calc R . . 
H13C H 1.6500 1.7456 -0.0242 0.206 Uiso 1 1 calc R . . 
C120 C 0.5947(4) 1.0984(6) -0.15509(18) 0.118(4) Uani 1 1 d . . . 
H12A H 0.5835 1.0802 -0.1407 0.177 Uiso 1 1 calc R . . 
H12B H 0.5847 1.0692 -0.1663 0.177 Uiso 1 1 calc R . . 
H12C H 0.5746 1.1194 -0.1580 0.177 Uiso 1 1 calc R . . 
C121 C 1.6973(3) 1.5325(3) 0.03238(16) 0.070(3) Uani 1 1 d . . . 
C122 C 1.2987(3) 1.3414(3) -0.07605(13) 0.0538(19) Uani 1 1 d . . . 
H12S H 1.3019 1.3554 -0.0912 0.065 Uiso 1 1 calc R . . 
H12T H 1.3291 1.3723 -0.0673 0.065 Uiso 1 1 calc R . . 
C123 C 1.4622(3) 1.1621(3) -0.08308(13) 0.0556(18) Uani 1 1 d . . . 
N2 N 0.8412(4) 1.2980(4) -0.23643(13) 0.099(3) Uani 1 1 d D . . 
H2A H 0.8336 1.2805 -0.2238 0.119 Uiso 1 1 calc R . . 
C126 C 0.8278(6) 1.0329(7) -0.1302(4) 0.157(5) Uani 1 1 d U . . 
C127 C 1.2277(4) 1.3783(4) -0.07075(18) 0.087(3) Uani 1 1 d . . . 
H12U H 1.1905 1.3705 -0.0653 0.131 Uiso 1 1 calc R . . 
H12V H 1.2298 1.3851 -0.0865 0.131 Uiso 1 1 calc R . . 
H12W H 1.2579 1.4121 -0.0634 0.131 Uiso 1 1 calc R . . 
C128 C 1.1374(4) 1.4014(3) -0.11408(17) 0.076(3) Uani 1 1 d . . . 
H12D H 1.1189 1.4243 -0.1157 0.114 Uiso 1 1 calc R . . 
H12E H 1.1779 1.4264 -0.1108 0.114 Uiso 1 1 calc R . . 
H12F H 1.1194 1.3742 -0.1021 0.114 Uiso 1 1 calc R . . 
N1 N 1.0137(3) 1.2368(3) -0.24465(9) 0.0609(18) Uani 1 1 d . . . 
H1A H 1.0344 1.2728 -0.2483 0.073 Uiso 1 1 calc R . . 
N3 N 0.8167(3) 1.0737(3) -0.24908(10) 0.0621(18) Uani 1 1 d . . . 
H3A H 0.7807 1.0645 -0.2485 0.074 Uiso 1 1 calc R . . 
N4 N 1.7385(3) 1.5872(3) 0.03293(9) 0.0535(16) Uani 1 1 d . . . 
H4A H 1.7271 1.6123 0.0336 0.064 Uiso 1 1 calc R . . 
N5 N 1.9077(3) 1.5580(3) 0.02889(9) 0.0503(15) Uani 1 1 d . . . 
H5A H 1.9438 1.5727 0.0322 0.060 Uiso 1 1 calc R . . 
N10 N 1.4734(2) 1.3959(2) -0.09027(8) 0.0436(14) Uani 1 1 d . . . 
H11O H 1.4371 1.3851 -0.0890 0.052 Uiso 1 1 calc R . . 
N7 N 0.7701(2) 1.0015(3) -0.13139(10) 0.0538(16) Uani 1 1 d . . . 
H7B H 0.7520 1.0206 -0.1326 0.065 Uiso 1 1 calc R . . 
N11 N 1.6719(2) 1.5675(2) -0.08592(9) 0.0426(14) Uani 1 1 d . . . 
H11P H 1.6921 1.6044 -0.0879 0.051 Uiso 1 1 calc R . . 
N9 N 1.0624(3) 1.2554(2) -0.12664(10) 0.0535(16) Uani 1 1 d . . . 
H9A H 1.0504 1.2796 -0.1288 0.064 Uiso 1 1 calc R . . 
N8 N 1.2492(4) 1.4421(3) -0.16007(14) 0.096(3) Uani 1 1 d D . . 
H8A H 1.2343 1.4164 -0.1705 0.115 Uiso 1 1 calc R . . 
O1 O 1.0167(3) 1.1626(3) -0.23014(12) 0.0906(19) Uani 1 1 d . . . 
O2 O 1.1259(3) 1.3363(3) -0.24275(9) 0.0782(18) Uani 1 1 d . . . 
O3 O 1.2841(2) 1.2950(2) -0.25139(9) 0.0693(16) Uani 1 1 d . . . 
O4 O 0.9711(3) 1.3128(2) -0.24629(10) 0.0798(18) Uani 1 1 d . . . 
O5 O 0.7751(2) 1.1472(2) -0.25217(10) 0.0703(15) Uani 1 1 d . . . 
O6 O 0.8811(3) 1.0391(3) -0.25414(19) 0.147(3) Uani 1 1 d . . . 
O7 O 1.8145(3) 1.7053(2) 0.03504(8) 0.0668(16) Uani 1 1 d . . . 
O8 O 1.9785(2) 1.6775(2) 0.02959(8) 0.0592(14) Uani 1 1 d . . . 
O10 O 1.5366(3) 1.3646(2) -0.10021(10) 0.0763(17) Uani 1 1 d . . . 
O11 O 1.36361(19) 1.3083(2) -0.08455(8) 0.0498(12) Uani 1 1 d . . . 
O12 O 1.3369(2) 1.11399(19) -0.07832(8) 0.0536(13) Uani 1 1 d . . . 
O13 O 1.5144(5) 1.1902(4) -0.0854(5) 0.47(2) Uani 1 1 d . . . 
N14 N 1.4696(3) 1.5819(3) -0.05850(14) 0.077(2) Uani 1 1 d D . . 
H14N H 1.4688 1.5580 -0.0486 0.093 Uiso 1 1 calc R . . 
O15 O 1.4303(2) 1.4662(2) -0.08369(10) 0.0604(14) Uani 1 1 d . . . 
O16 O 1.6235(2) 1.6343(2) -0.07910(10) 0.0707(16) Uani 1 1 d . . . 
O17 O 0.7806(2) 1.1112(2) -0.13964(8) 0.0550(13) Uani 1 1 d . . . 
O18 O 0.97269(19) 1.2758(2) -0.13335(8) 0.0514(12) Uani 1 1 d . . . 
O19 O 0.8551(2) 1.0067(2) -0.13897(9) 0.0731(15) Uani 1 1 d . . . 
O20 O 1.0322(2) 1.1629(3) -0.11801(13) 0.099(2) Uani 1 1 d . . . 
O21 O 1.2994(3) 1.3448(3) -0.13949(10) 0.0782(17) Uani 1 1 d . . . 
O22 O 1.1319(2) 1.3718(2) -0.13351(9) 0.0679(15) Uani 1 1 d . . . 
O23 O 1.2865(3) 1.4564(2) -0.12505(14) 0.094(2) Uani 1 1 d . . . 
O24 O 1.7081(3) 1.4962(3) 0.0321(3) 0.219(7) Uani 1 1 d . . . 
O25 O 1.45748(19) 1.4587(2) 0.02668(8) 0.0534(13) Uani 1 1 d . . . 
O26 O 1.8292(3) 1.4785(3) 0.01473(13) 0.108(3) Uani 1 1 d . . . 
O27 O 1.9498(3) 1.7744(2) 0.05613(11) 0.0832(19) Uani 1 1 d . . . 
O28 O 1.6553(2) 1.6157(2) 0.03438(9) 0.0660(15) Uani 1 1 d . . . 
C11 C 1.4072(7) 1.4344(7) -0.2340(3) 0.222(9) Uani 1 1 d DU . . 
H11V H 1.4334 1.4412 -0.2466 0.267 Uiso 1 1 calc R . . 
C20 C 1.0479(5) 1.4805(4) -0.14791(15) 0.088(3) Uani 1 1 d . . . 
H20A H 1.0602 1.4899 -0.1327 0.132 Uiso 1 1 calc R . . 
H20B H 1.0389 1.5086 -0.1539 0.132 Uiso 1 1 calc R . . 
H20C H 1.0786 1.4809 -0.1565 0.132 Uiso 1 1 calc R . . 
C41 C 1.4266(7) 1.4520(6) -0.2098(3) 0.200(9) Uani 1 1 d D . . 
H41A H 1.4593 1.4908 -0.2095 0.299 Uiso 1 1 calc R . . 
H41B H 1.4375 1.4257 -0.2034 0.299 Uiso 1 1 calc R . . 
H41C H 1.3953 1.4506 -0.2013 0.299 Uiso 1 1 calc R . . 
C27 C 1.1386(7) 1.5292(6) -0.2376(2) 0.146(5) Uani 1 1 d . . . 
H27A H 1.1663 1.5701 -0.2377 0.219 Uiso 1 1 calc R . . 
H27B H 1.1210 1.5180 -0.2231 0.219 Uiso 1 1 calc R . . 
H27C H 1.1092 1.5209 -0.2486 0.219 Uiso 1 1 calc R . . 
C81 C 1.4003(5) 1.4694(5) -0.1048(2) 0.128(5) Uani 1 1 d . . . 
H81A H 1.3593 1.4515 -0.1022 0.192 Uiso 1 1 calc R . . 
H81B H 1.4073 1.4495 -0.1167 0.192 Uiso 1 1 calc R . . 
H81C H 1.4154 1.5094 -0.1089 0.192 Uiso 1 1 calc R . . 
C63 C 1.2217(5) 1.5117(5) -0.1769(2) 0.184(7) Uani 1 1 d D . . 
H63A H 1.1889 1.4975 -0.1671 0.276 Uiso 1 1 calc R . . 
H63B H 1.2101 1.4903 -0.1907 0.276 Uiso 1 1 calc R . . 
H63C H 1.2363 1.5521 -0.1799 0.276 Uiso 1 1 calc R . . 
C50 C 1.1858(6) 1.5063(5) -0.26748(19) 0.134(4) Uani 1 1 d . . . 
H50A H 1.2125 1.5469 -0.2698 0.200 Uiso 1 1 calc R . . 
H50B H 1.1516 1.4945 -0.2763 0.200 Uiso 1 1 calc R . . 
H50C H 1.2038 1.4842 -0.2717 0.200 Uiso 1 1 calc R . . 
C61 C 1.8140(7) 1.7383(7) 0.01687(18) 0.142(5) Uani 1 1 d . . . 
H61A H 1.7954 1.7599 0.0212 0.213 Uiso 1 1 calc R . . 
H61B H 1.7931 1.7129 0.0047 0.213 Uiso 1 1 calc R . . 
H61C H 1.8532 1.7648 0.0123 0.213 Uiso 1 1 calc R . . 
C99 C 1.1636(4) 0.9305(3) -0.06320(17) 0.092(3) Uani 1 1 d D . . 
H99A H 1.1633 0.9210 -0.0787 0.137 Uiso 1 1 calc R . . 
H99B H 1.1246 0.9099 -0.0575 0.137 Uiso 1 1 calc R . . 
H99C H 1.1876 0.9195 -0.0550 0.137 Uiso 1 1 calc R . . 
C108 C 1.3394(6) 1.4947(7) 0.0284(2) 0.154(6) Uani 1 1 d . . . 
H10G H 1.3511 1.5180 0.0147 0.184 Uiso 1 1 calc R . . 
C109 C 2.0055(5) 1.6915(5) 0.00885(17) 0.098(3) Uani 1 1 d . . . 
H10H H 2.0464 1.7061 0.0107 0.148 Uiso 1 1 calc R . . 
H10I H 1.9995 1.7206 0.0019 0.148 Uiso 1 1 calc R . . 
H10J H 1.9892 1.6573 -0.0003 0.148 Uiso 1 1 calc R . . 
C83 C 1.3204(5) 1.5235(6) -0.1823(2) 0.216(11) Uani 1 1 d D . . 
H83A H 1.3306 1.5635 -0.1857 0.259 Uiso 1 1 calc R . . 
C136 C 1.4412(4) 1.6154(4) -0.05504(19) 0.108(4) Uani 1 1 d D . . 
H13J H 1.4209 1.6176 -0.0683 0.129 Uiso 1 1 calc R . . 
C137 C 1.4841(6) 1.6760(6) -0.0450(3) 0.182(7) Uani 1 1 d D . . 
H13K H 1.5124 1.6993 -0.0561 0.273 Uiso 1 1 calc R . . 
H13L H 1.5033 1.6713 -0.0323 0.273 Uiso 1 1 calc R . . 
H13M H 1.4629 1.6949 -0.0405 0.273 Uiso 1 1 calc R . . 
N20 N 1.5563(3) 1.2248(3) -0.14449(15) 0.098(2) Uani 1 1 d . . . 
C140 C 1.5849(8) 1.2525(8) -0.1678(2) 0.192(7) Uani 1 1 d . . . 
H14O H 1.5551 1.2397 -0.1790 0.287 Uiso 1 1 calc R . . 
H14P H 1.6122 1.2404 -0.1718 0.287 Uiso 1 1 calc R . . 
H14Q H 1.6046 1.2941 -0.1667 0.287 Uiso 1 1 calc R . . 
C143 C 1.9920(5) 1.8549(3) 0.02450(19) 0.129(5) Uani 1 1 d D . . 
H14D H 1.9887 1.8597 0.0406 0.155 Uiso 1 1 calc R . . 
C145 C 1.3516(14) 1.5387(15) 0.0431(6) 0.351(17) Uani 1 1 d U . . 
H14E H 1.3246 1.5523 0.0410 0.526 Uiso 1 1 calc R . . 
H14F H 1.3904 1.5701 0.0406 0.526 Uiso 1 1 calc R . . 
H14G H 1.3483 1.5246 0.0581 0.526 Uiso 1 1 calc R . . 
C144 C 1.9664(5) 1.8882(4) 0.0119(2) 0.156(6) Uani 1 1 d D . . 
H14H H 1.9264 1.8724 0.0160 0.235 Uiso 1 1 calc R . . 
H14I H 1.9691 1.8841 -0.0039 0.235 Uiso 1 1 calc R . . 
H14J H 1.9878 1.9286 0.0159 0.235 Uiso 1 1 calc R . . 
C151 C 1.4002(6) 1.5823(6) -0.0357(2) 0.204(10) Uani 1 1 d D . . 
H15G H 1.4234 1.5766 -0.0243 0.245 Uiso 1 1 calc R . . 
C134 C 1.2753(6) 1.4509(7) 0.0217(4) 0.233(11) Uani 1 1 d . . . 
H13D H 1.2521 1.4690 0.0234 0.349 Uiso 1 1 calc R . . 
H13E H 1.2603 1.4172 0.0311 0.349 Uiso 1 1 calc R . . 
H13F H 1.2741 1.4395 0.0064 0.349 Uiso 1 1 calc R . . 
C156 C 1.5015(5) 1.1865(5) -0.1408(2) 0.112(4) Uani 1 1 d . . . 
H15F H 1.4901 1.1669 -0.1272 0.134 Uiso 1 1 calc R . . 
O36 O 1.4690(4) 1.1777(3) -0.15402(11) 0.118(2) Uani 1 1 d . . . 
C157 C 1.3558(4) 1.5224(5) -0.0443(2) 0.137(5) Uani 1 1 d D . . 
H15M H 1.3583 1.5216 -0.0602 0.205 Uiso 1 1 calc R . . 
H15N H 1.3174 1.5140 -0.0401 0.205 Uiso 1 1 calc R . . 
H15O H 1.3634 1.4938 -0.0379 0.205 Uiso 1 1 calc R . . 
N24 N 0.9768(15) 0.9368(4) -0.2754(4) 0.63(5) Uani 1 1 d D . . 
H24A H 1.0001 0.9234 -0.2766 0.758 Uiso 1 1 calc R . . 
H24B H 0.9399 0.9134 -0.2748 0.758 Uiso 1 1 calc R . . 
C148 C 0.7700(7) 1.3875(7) -0.2308(6) 0.46(2) Uani 1 1 d DU . . 
H14A H 0.7933 1.4170 -0.2415 0.690 Uiso 1 1 calc R . . 
H14B H 0.7822 1.4024 -0.2160 0.690 Uiso 1 1 calc R . . 
H14C H 0.7299 1.3763 -0.2328 0.690 Uiso 1 1 calc R . . 
C54 C 0.8423(9) 1.3546(7) -0.2369(3) 0.313(19) Uani 1 1 d D . . 
H54A H 0.8577 1.3752 -0.2510 0.375 Uiso 1 1 calc R . . 
C133 C 0.7777(9) 1.3337(6) -0.2343(4) 0.314(17) Uani 1 1 d D . . 
H13A H 0.7588 1.3156 -0.2484 0.377 Uiso 1 1 calc R . . 
C102 C 0.8624(6) 1.3952(6) -0.2175(3) 0.156(5) Uani 1 1 d D . . 
H10D H 0.9032 1.4102 -0.2152 0.234 Uiso 1 1 calc R . . 
H10E H 0.8415 1.3748 -0.2043 0.234 Uiso 1 1 calc R . . 
H10F H 0.8555 1.4268 -0.2204 0.234 Uiso 1 1 calc R . . 
C147 C 2.0771(5) 1.8463(6) 0.0348(3) 0.175(6) Uani 1 1 d DU . . 
H14K H 2.0441 1.8125 0.0409 0.262 Uiso 1 1 calc R . . 
H14L H 2.0995 1.8719 0.0467 0.262 Uiso 1 1 calc R . . 
H14M H 2.1007 1.8347 0.0267 0.262 Uiso 1 1 calc R . . 
C141 C 1.5968(5) 1.2503(5) -0.1249(3) 0.172(7) Uani 1 1 d . . . 
H14R H 1.5765 1.2316 -0.1114 0.258 Uiso 1 1 calc R . . 
H14S H 1.6103 1.2912 -0.1239 0.258 Uiso 1 1 calc R . . 
H14T H 1.6294 1.2445 -0.1268 0.258 Uiso 1 1 calc R . . 
C47 C 1.3509(5) 1.3753(4) -0.22889(18) 0.104(4) Uani 1 1 d D . . 
H47A H 1.3600 1.3492 -0.2208 0.125 Uiso 1 1 calc R . . 
H47B H 1.3234 1.3812 -0.2203 0.125 Uiso 1 1 calc R . . 
C154 C 0.7440(10) 1.2902(9) -0.2156(4) 0.269(10) Uani 1 1 d DU . . 
H15A H 0.7403 1.2532 -0.2190 0.403 Uiso 1 1 calc R . . 
H15B H 0.7060 1.2859 -0.2142 0.403 Uiso 1 1 calc R . . 
H15C H 0.7645 1.3043 -0.2017 0.403 Uiso 1 1 calc R . . 
C162 C 1.6745(16) 1.7864(13) 0.0310(4) 0.295(19) Uani 1 1 d . . . 
C163 C 1.6667 1.3333 -0.0668(4) 0.137(8) Uani 1 3 d SD . . 
C155 C -0.3333 0.3333 0.1733(4) 0.221(19) Uani 1 3 d SD . . 
N33 N -0.2993(8) 0.3043(9) 0.1737(4) 0.372(18) Uani 1 1 d D . . 
H33A H -0.3165 0.2670 0.1741 0.446 Uiso 1 1 calc R . . 
H33B H -0.2620 0.3245 0.1734 0.446 Uiso 1 1 calc R . . 
N30 N 1.6187(7) 1.3425(9) -0.0652(3) 0.267(8) Uani 1 1 d DU . . 
H30B H 1.5842 1.3134 -0.0634 0.321 Uiso 1 1 calc R . . 
H30C H 1.6240 1.3771 -0.0661 0.321 Uiso 1 1 calc R . . 
C164 C 1.0000 1.0000 -0.2744(3) 0.065(3) Uani 1 3 d SDU . . 
Cl2' Cl 0.1654(6) 0.7634(5) 0.30223(12) 0.150(5) Uani 0.33 1 d P . . 
Cl3 Cl 0.1606(6) 0.8470(7) 0.30706(13) 0.163(6) Uani 0.33 1 d P . . 
Cl2 Cl 0.2199(5) 0.7634(6) 0.29839(18) 0.230(5) Uani 0.50 1 d P . . 
Cl4 Cl -0.6370(13) 0.1172(4) 0.14629(17) 0.51(2) Uani 0.50 1 d P . . 
Cl4' Cl -0.6889(5) 0.1565(7) 0.14301(17) 0.153(5) Uani 0.33 1 d P . . 
Cl' Cl -0.6147(6) 0.1886(6) 0.14764(12) 0.585(14) Uani 1 1 d . . . 
Cl1 Cl 0.5174(2) 0.5932(2) 0.14355(10) 0.0565(14) Uani 0.33 1 d P . . 
Cl1' Cl 0.4891(4) 0.4810(3) 0.14246(12) 0.104(2) Uani 0.33 1 d P . . 
Cl6 Cl 0.9251(2) 0.7421(2) -0.02741(9) 0.0488(13) Uani 0.33 1 d P . . 
C160 C 2.0561(7) 1.8779(9) 0.0191(4) 0.239(9) Uani 1 1 d DU . . 
H16A H 2.0534 1.8586 0.0049 0.286 Uiso 1 1 calc R . . 
C150 C 1.3786(9) 1.6198(8) -0.0252(3) 0.215(9) Uani 1 1 d . . . 
H15H H 1.3511 1.5982 -0.0136 0.323 Uiso 1 1 calc R . . 
H15I H 1.3601 1.6309 -0.0363 0.323 Uiso 1 1 calc R . . 
H15J H 1.4108 1.6539 -0.0189 0.323 Uiso 1 1 calc R . . 
C161 C 2.1094(14) 1.9394(11) 0.0148(9) 0.57(4) Uani 1 1 d DU . . 
H16B H 2.0973 1.9622 0.0064 0.851 Uiso 1 1 calc R . . 
H16C H 2.1384 1.9357 0.0066 0.851 Uiso 1 1 calc R . . 
H16D H 2.1253 1.9580 0.0289 0.851 Uiso 1 1 calc R . . 
C91 C 1.3725(11) 1.4684(8) -0.2299(2) 0.312(18) Uani 1 1 d . . . 
H91A H 1.3993 1.5095 -0.2300 0.468 Uiso 1 1 calc R . . 
H91B H 1.3529 1.4571 -0.2158 0.468 Uiso 1 1 calc R . . 
H91C H 1.3444 1.4589 -0.2416 0.468 Uiso 1 1 calc R . . 
C22 C 1.2971(11) 1.4921(12) -0.2046(2) 0.50(4) Uani 1 1 d D . . 
H22A H 1.2664 1.4984 -0.2097 0.755 Uiso 1 1 calc R . . 
H22B H 1.2823 1.4513 -0.2027 0.755 Uiso 1 1 calc R . . 
H22C H 1.3279 1.5071 -0.2154 0.755 Uiso 1 1 calc R . . 
C132 C 1.3735(8) 1.5316(9) -0.1688(4) 0.230(8) Uani 1 1 d DU . . 
H13G H 1.3797 1.5566 -0.1563 0.345 Uiso 1 1 calc R . . 
H13H H 1.4073 1.5487 -0.1782 0.345 Uiso 1 1 calc R . . 
H13I H 1.3665 1.4945 -0.1636 0.345 Uiso 1 1 calc R . . 
C165 C 1.0000 1.0000 -0.3321(6) 0.243(18) Uani 1 3 d SD . . 
N34 N 0.9678(9) 0.9376(4) -0.3318(6) 0.67(5) Uani 1 1 d D . . 
H34A H 0.9859 0.9184 -0.3314 0.799 Uiso 1 1 calc R . . 
H34B H 0.9304 0.9196 -0.3320 0.799 Uiso 1 1 calc R . . 
 
loop_ 
 _atom_site_aniso_label 
 _atom_site_aniso_U_11 
 _atom_site_aniso_U_22 
 _atom_site_aniso_U_33 
 _atom_site_aniso_U_23 
 _atom_site_aniso_U_13 
 _atom_site_aniso_U_12 
C10 0.147(12) 0.214(14) 0.133(10) 0.104(10) 0.097(9) 0.137(11) 
C12 0.043(4) 0.057(5) 0.036(4) 0.003(3) 0.002(3) 0.021(4) 
C33 0.048(5) 0.052(5) 0.065(5) -0.015(4) 0.007(4) 0.017(4) 
C44 0.077(6) 0.064(6) 0.095(7) 0.016(4) 0.046(5) 0.051(5) 
C24 0.032(4) 0.052(4) 0.040(4) 0.008(3) 0.017(3) 0.014(3) 
C2 0.031(4) 0.055(5) 0.040(4) -0.005(3) 0.010(3) 0.018(3) 
C106 0.030(4) 0.044(4) 0.054(4) -0.005(3) 0.005(3) 0.016(3) 
C4 0.027(3) 0.032(4) 0.040(4) 0.011(3) 0.011(3) 0.010(3) 
C38 0.048(4) 0.041(4) 0.038(4) -0.002(3) -0.012(3) 0.026(4) 
C5 0.038(4) 0.036(4) 0.048(4) -0.005(3) -0.016(3) 0.024(3) 
C116 0.043(4) 0.059(5) 0.068(5) -0.025(4) -0.024(4) 0.025(4) 
C16 0.056(5) 0.048(5) 0.107(7) -0.010(4) 0.029(4) 0.033(4) 
C34 0.056(6) 0.030(4) 0.113(7) -0.003(4) 0.011(5) 0.020(4) 
C15 0.049(5) 0.098(7) 0.053(5) 0.032(4) 0.018(4) 0.039(5) 
C17 0.073(6) 0.080(6) 0.030(4) -0.012(4) -0.005(4) 0.039(5) 
C130 0.062(6) 0.061(6) 0.079(6) 0.017(4) 0.010(4) 0.039(5) 
C37 0.061(5) 0.046(5) 0.092(6) -0.006(4) -0.010(4) 0.040(4) 
C96 0.069(6) 0.072(6) 0.052(5) -0.009(4) 0.004(4) 0.039(5) 
C3 0.060(5) 0.055(5) 0.029(4) -0.005(3) 0.000(3) 0.033(4) 
C53 0.077(6) 0.081(6) 0.027(4) -0.001(4) 0.003(3) 0.041(5) 
C1 0.053(5) 0.058(5) 0.028(3) 0.009(3) 0.008(3) 0.032(4) 
C67 0.070(6) 0.042(5) 0.072(6) 0.005(4) 0.019(4) 0.025(4) 
C23 0.079(6) 0.100(7) 0.035(4) 0.000(4) 0.015(4) 0.055(6) 
C118 0.046(5) 0.034(4) 0.061(5) -0.003(3) 0.009(3) 0.010(4) 
C13 0.079(6) 0.059(5) 0.031(4) -0.016(3) 0.006(3) 0.044(5) 
C48 0.051(5) 0.073(6) 0.056(5) 0.001(4) 0.003(4) 0.038(5) 
C21 0.043(4) 0.045(4) 0.044(4) -0.005(3) 0.006(3) 0.023(4) 
C92 0.030(4) 0.036(4) 0.068(5) 0.012(3) 0.009(3) 0.002(3) 
C19 0.036(4) 0.024(4) 0.105(6) 0.001(4) -0.005(4) 0.003(3) 
C70 0.030(4) 0.041(4) 0.100(6) -0.010(4) 0.003(4) 0.019(4) 
C18 0.033(4) 0.047(5) 0.085(6) -0.004(4) 0.007(4) 0.013(4) 
C125 0.043(4) 0.039(4) 0.053(4) -0.007(3) 0.008(3) 0.014(4) 
C82 0.051(5) 0.043(5) 0.079(6) 0.003(4) 0.009(4) 0.020(4) 
C7 0.049(5) 0.033(4) 0.070(5) 0.008(3) -0.011(4) 0.018(4) 
C77 0.065(5) 0.057(5) 0.055(5) 0.018(4) 0.001(4) 0.033(5) 
C8 0.030(4) 0.036(4) 0.097(6) 0.011(4) -0.016(4) 0.012(3) 
C6 0.057(5) 0.059(5) 0.073(5) -0.019(4) 0.003(4) 0.031(4) 
C14 0.064(5) 0.039(4) 0.051(4) -0.006(3) -0.004(3) 0.038(4) 
C25 0.066(5) 0.067(6) 0.042(4) 0.017(4) 0.018(4) 0.040(5) 
C29 0.037(4) 0.059(5) 0.069(5) 0.021(4) 0.010(3) 0.029(4) 
C31 0.073(6) 0.080(6) 0.066(5) -0.014(4) 0.006(4) 0.044(5) 
C32 0.058(6) 0.061(6) 0.066(5) 0.002(4) 0.005(4) 0.025(5) 
C35 0.051(5) 0.044(4) 0.054(4) 0.006(3) 0.020(3) 0.033(4) 
C36 0.062(5) 0.044(5) 0.087(6) 0.012(4) 0.020(4) 0.038(4) 
C39 0.085(7) 0.140(9) 0.097(7) 0.044(6) 0.000(5) 0.074(7) 
C43 0.029(4) 0.053(5) 0.093(6) -0.017(4) 0.006(4) 0.009(4) 
C45 0.047(5) 0.039(4) 0.067(5) -0.006(3) 0.023(4) 0.016(4) 
C46 0.083(7) 0.129(10) 0.140(10) 0.032(7) 0.057(6) 0.083(7) 
C49 0.062(6) 0.075(7) 0.114(8) -0.044(5) -0.043(5) 0.039(5) 
C51 0.071(5) 0.042(4) 0.056(5) 0.008(3) -0.013(4) 0.018(4) 
C52 0.161(10) 0.046(5) 0.089(7) 0.003(4) 0.080(6) 0.033(6) 
C55 0.111(8) 0.051(6) 0.070(6) -0.027(4) -0.034(5) 0.041(6) 
C56 0.085(6) 0.061(6) 0.065(6) -0.002(5) -0.004(5) 0.040(5) 
C57 0.035(4) 0.024(4) 0.137(8) 0.018(5) -0.005(5) 0.016(4) 
C58 0.040(4) 0.037(4) 0.057(4) -0.020(3) -0.026(3) 0.019(4) 
C59 0.126(9) 0.045(5) 0.069(6) -0.004(4) 0.037(5) 0.048(6) 
C60 0.110(9) 0.094(8) 0.086(7) 0.013(6) -0.019(6) 0.052(7) 
C62 0.032(4) 0.027(3) 0.069(5) -0.001(3) 0.009(3) 0.009(3) 
C64 0.041(4) 0.059(5) 0.074(5) -0.004(4) 0.009(3) 0.023(4) 
C68 0.108(9) 0.084(8) 0.112(8) -0.040(6) 0.007(6) 0.039(7) 
C69 0.083(6) 0.038(4) 0.085(6) -0.010(4) -0.001(5) 0.032(5) 
O30 0.109(5) 0.074(4) 0.079(5) 0.002(3) -0.003(4) 0.046(4) 
C73 0.033(4) 0.073(6) 0.064(5) -0.002(4) 0.004(3) 0.003(4) 
C74 0.115(8) 0.054(6) 0.115(8) 0.013(5) -0.019(7) 0.018(6) 
C75 0.068(6) 0.053(5) 0.085(7) -0.005(4) 0.010(5) 0.006(5) 
C76 0.052(5) 0.041(4) 0.058(5) 0.012(3) 0.000(4) 0.023(4) 
C79 0.033(4) 0.067(6) 0.104(7) -0.011(5) 0.008(4) 0.032(4) 
O14 0.076(5) 0.069(5) 0.188(8) 0.049(5) 0.034(5) 0.028(4) 
C84 0.124(9) 0.112(9) 0.102(8) 0.004(6) -0.001(6) 0.078(8) 
C86 0.094(6) 0.051(5) 0.058(5) 0.012(4) 0.035(4) 0.049(5) 
C87 0.110(8) 0.056(5) 0.083(6) -0.032(4) 0.035(5) 0.009(5) 
C90 0.048(4) 0.036(4) 0.044(4) 0.000(3) 0.003(3) 0.028(3) 
C93 0.047(5) 0.087(6) 0.062(5) 0.025(4) 0.006(4) 0.028(5) 
C95 0.057(5) 0.091(7) 0.085(6) -0.003(5) -0.008(4) 0.054(5) 
C97 0.087(7) 0.077(7) 0.106(7) 0.045(5) 0.033(5) 0.044(6) 
C98 0.055(5) 0.053(5) 0.057(5) -0.023(3) -0.019(3) 0.035(4) 
C9 0.104(7) 0.040(5) 0.034(4) -0.014(3) 0.004(4) 0.033(5) 
C110 0.029(4) 0.033(4) 0.059(5) 0.004(3) -0.001(3) 0.003(3) 
C28 0.065(5) 0.038(4) 0.027(3) 0.003(3) 0.000(3) 0.021(4) 
C40 0.064(5) 0.053(5) 0.050(5) 0.014(3) -0.005(4) 0.032(4) 
C30 0.040(4) 0.055(5) 0.027(3) -0.002(3) -0.004(3) 0.015(4) 
C100 0.105(8) 0.146(9) 0.090(7) 0.023(6) -0.003(6) 0.089(7) 
N6 0.123(8) 0.057(5) 0.121(8) 0.009(5) -0.051(6) 0.001(5) 
C105 0.077(7) 0.112(8) 0.107(8) 0.008(6) 0.036(6) 0.052(6) 
C112 0.097(7) 0.104(8) 0.077(6) 0.021(5) -0.012(5) 0.068(6) 
C113 0.058(7) 0.049(6) 0.180(13) 0.008(7) -0.035(7) 0.020(5) 
C114 0.107(8) 0.030(4) 0.138(9) 0.005(5) 0.042(6) 0.037(5) 
C85 0.052(8) 0.067(9) 0.034(7) 0.038(6) 0.011(5) 0.048(7) 
C85' 0.078(13) 0.044(11) 0.22(3) -0.026(12) -0.057(14) -0.012(10) 
C10' 0.059(15) 0.035(13) 0.69(12) -0.04(3) -0.01(3) -0.037(12) 
C103 0.114(13) 0.060(8) 0.059(8) 0.048(7) 0.071(8) 0.078(10) 
C135 0.23(2) 0.135(13) 0.206(16) 0.070(11) 0.068(14) 0.132(14) 
C120 0.055(6) 0.179(12) 0.086(7) 0.011(7) -0.019(5) 0.033(7) 
C121 0.030(4) 0.041(5) 0.128(7) -0.021(4) 0.031(4) 0.010(4) 
C122 0.020(3) 0.041(4) 0.085(5) 0.007(3) -0.012(3) 0.003(3) 
C123 0.026(4) 0.035(4) 0.113(6) 0.004(3) 0.014(3) 0.020(3) 
N2 0.153(8) 0.108(7) 0.086(6) 0.034(5) 0.066(5) 0.103(6) 
C126 0.097(7) 0.133(9) 0.251(11) 0.002(8) 0.015(7) 0.066(6) 
C127 0.055(5) 0.060(6) 0.157(9) 0.012(5) 0.028(5) 0.035(5) 
C128 0.061(5) 0.052(5) 0.136(8) -0.054(5) -0.038(5) 0.045(5) 
N1 0.096(5) 0.052(4) 0.040(4) 0.011(3) -0.003(3) 0.041(4) 
N3 0.073(5) 0.056(4) 0.067(4) 0.007(3) 0.031(3) 0.039(4) 
N4 0.066(4) 0.053(4) 0.042(3) -0.002(3) 0.017(3) 0.030(4) 
N5 0.056(4) 0.049(4) 0.050(4) 0.005(3) -0.013(3) 0.029(3) 
N10 0.031(3) 0.047(4) 0.046(3) 0.008(3) 0.014(2) 0.015(3) 
N7 0.038(4) 0.059(4) 0.067(4) -0.009(3) -0.013(3) 0.026(3) 
N11 0.027(3) 0.045(3) 0.049(3) 0.011(3) -0.003(2) 0.014(3) 
N9 0.047(4) 0.023(3) 0.081(4) -0.001(3) 0.003(3) 0.010(3) 
N8 0.116(7) 0.031(4) 0.129(7) 0.013(4) 0.019(5) 0.028(4) 
O1 0.065(4) 0.098(5) 0.123(5) 0.032(4) 0.017(4) 0.052(4) 
O2 0.093(5) 0.084(5) 0.047(3) -0.008(3) -0.003(3) 0.037(4) 
O3 0.060(4) 0.058(4) 0.074(4) -0.002(3) -0.027(3) 0.018(3) 
O4 0.092(5) 0.056(4) 0.086(5) 0.009(3) 0.023(3) 0.032(3) 
O5 0.049(3) 0.070(4) 0.087(4) -0.009(3) -0.007(3) 0.026(3) 
O6 0.081(5) 0.082(5) 0.277(11) 0.021(6) 0.060(6) 0.041(5) 
O7 0.100(4) 0.050(3) 0.041(3) 0.005(2) -0.006(3) 0.031(3) 
O8 0.067(4) 0.053(3) 0.053(3) 0.012(2) 0.021(3) 0.027(3) 
O10 0.074(4) 0.071(4) 0.112(5) 0.009(3) 0.015(3) 0.057(3) 
O11 0.038(3) 0.052(3) 0.072(3) 0.014(2) 0.011(2) 0.031(2) 
O12 0.056(3) 0.026(3) 0.066(3) -0.007(2) 0.005(2) 0.011(2) 
O13 0.111(8) 0.078(6) 1.24(6) 0.151(15) 0.214(17) 0.069(6) 
N14 0.058(5) 0.066(5) 0.100(6) -0.021(4) 0.004(4) 0.024(4) 
O15 0.032(3) 0.044(3) 0.113(4) 0.005(3) 0.007(3) 0.024(3) 
O16 0.045(3) 0.040(3) 0.130(5) -0.019(3) -0.002(3) 0.024(3) 
O17 0.058(3) 0.039(3) 0.066(3) 0.006(2) -0.003(3) 0.023(3) 
O18 0.035(3) 0.055(3) 0.060(3) 0.007(2) 0.003(2) 0.019(2) 
O19 0.065(4) 0.067(4) 0.090(4) -0.004(3) 0.029(3) 0.036(3) 
O20 0.036(3) 0.085(4) 0.187(7) 0.072(4) 0.018(3) 0.039(3) 
O21 0.077(4) 0.080(4) 0.091(4) 0.013(3) 0.012(3) 0.049(4) 
O22 0.060(4) 0.061(4) 0.084(4) 0.002(3) -0.002(3) 0.032(3) 
O23 0.062(4) 0.027(3) 0.168(7) 0.011(3) -0.033(4) 0.003(3) 
O24 0.046(4) 0.030(4) 0.57(2) 0.025(7) 0.022(7) 0.013(3) 
O25 0.029(3) 0.057(3) 0.074(3) 0.000(2) 0.009(2) 0.021(2) 
O26 0.094(5) 0.097(5) 0.144(6) -0.056(4) -0.079(5) 0.057(4) 
O27 0.117(5) 0.038(3) 0.075(4) -0.014(3) -0.031(4) 0.024(3) 
O28 0.063(4) 0.048(3) 0.092(4) -0.008(3) 0.009(3) 0.031(3) 
C11 0.238(13) 0.206(12) 0.239(13) 0.015(9) -0.056(9) 0.123(10) 
C20 0.140(9) 0.053(5) 0.079(6) -0.020(4) -0.032(6) 0.054(6) 
C41 0.171(16) 0.121(13) 0.24(2) 0.044(12) -0.080(14) 0.022(11) 
C27 0.202(14) 0.109(10) 0.147(11) 0.034(8) 0.027(10) 0.093(10) 
C81 0.115(10) 0.071(8) 0.186(13) 0.009(7) -0.049(9) 0.037(7) 
C63 0.269(19) 0.095(10) 0.192(15) 0.015(9) -0.104(13) 0.094(12) 
C50 0.219(14) 0.093(7) 0.120(9) 0.050(6) 0.037(8) 0.101(9) 
C61 0.241(16) 0.212(14) 0.068(7) 0.027(8) 0.045(8) 0.184(14) 
C99 0.076(6) 0.058(6) 0.112(8) -0.018(5) 0.029(5) 0.012(5) 
C108 0.145(11) 0.247(16) 0.159(11) -0.110(11) -0.084(9) 0.165(13) 
C109 0.123(9) 0.106(8) 0.085(7) 0.018(6) 0.029(6) 0.071(7) 
C83 0.146(14) 0.129(13) 0.36(3) 0.140(17) 0.099(17) 0.058(11) 
C136 0.078(6) 0.112(8) 0.165(10) -0.064(7) -0.015(6) 0.071(6) 
C137 0.171(14) 0.172(14) 0.280(18) -0.109(13) -0.074(13) 0.144(13) 
N20 0.082(6) 0.080(5) 0.140(7) 0.017(5) 0.029(5) 0.047(5) 
C140 0.30(2) 0.270(19) 0.133(12) 0.017(12) -0.007(13) 0.240(19) 
C143 0.179(12) 0.033(5) 0.103(8) 0.006(5) -0.045(8) -0.001(6) 
C145 0.345(19) 0.360(19) 0.36(2) -0.021(10) 0.006(10) 0.188(12) 
C144 0.167(12) 0.053(6) 0.168(12) -0.039(7) 0.036(9) -0.006(7) 
C151 0.24(2) 0.36(3) 0.160(14) 0.048(17) 0.052(15) 0.26(2) 
C134 0.094(9) 0.184(15) 0.48(3) -0.135(17) -0.073(14) 0.112(11) 
C156 0.069(7) 0.126(9) 0.090(8) -0.013(6) 0.014(5) 0.011(6) 
O36 0.172(7) 0.127(6) 0.066(4) -0.021(4) -0.036(4) 0.084(6) 
C157 0.085(8) 0.158(12) 0.189(12) -0.060(10) -0.032(8) 0.077(8) 
N24 0.82(8) 0.107(12) 0.80(7) -0.11(2) -0.62(7) 0.11(3) 
C148 0.46(3) 0.46(3) 0.47(3) 0.000(10) 0.001(10) 0.239(15) 
C54 0.49(4) 0.63(5) 0.123(12) -0.12(2) -0.065(18) 0.51(4) 
C133 0.46(4) 0.117(14) 0.42(4) 0.091(19) 0.07(3) 0.19(2) 
C102 0.159(12) 0.168(13) 0.180(14) -0.032(10) -0.029(10) 0.111(11) 
C147 0.135(8) 0.173(9) 0.165(9) 0.006(7) -0.004(7) 0.038(7) 
C141 0.076(7) 0.131(10) 0.236(15) 0.108(10) -0.050(8) -0.003(7) 
C47 0.092(8) 0.081(7) 0.102(8) 0.017(6) -0.020(6) 0.016(6) 
C154 0.287(13) 0.263(13) 0.284(14) -0.004(9) 0.001(9) 0.159(10) 
C162 0.52(5) 0.36(4) 0.23(2) -0.04(2) -0.11(3) 0.38(4) 
C163 0.134(12) 0.134(12) 0.142(19) 0.000 0.000 0.067(6) 
C155 0.20(3) 0.20(3) 0.26(4) 0.000 0.000 0.101(13) 
N33 0.181(19) 0.36(4) 0.44(4) -0.04(3) -0.010(19) 0.03(2) 
N30 0.305(12) 0.233(11) 0.264(12) 0.045(8) -0.054(9) 0.134(9) 
C164 0.057(3) 0.057(3) 0.082(6) 0.000 0.000 0.0285(16) 
Cl2' 0.278(15) 0.214(10) 0.054(4) -0.004(5) -0.022(6) 0.195(11) 
Cl3 0.252(14) 0.311(16) 0.056(5) 0.034(6) 0.029(6) 0.238(14) 
Cl2 0.163(8) 0.339(15) 0.217(10) 0.080(9) 0.030(7) 0.146(10) 
Cl4 0.89(5) 0.116(7) 0.107(7) -0.024(5) 0.164(14) -0.055(15) 
Cl4' 0.089(7) 0.182(12) 0.101(8) -0.005(7) -0.010(5) 0.002(7) 
Cl' 0.59(2) 0.521(19) 0.123(5) -0.092(8) 0.081(8) -0.109(15) 
Cl1 0.044(3) 0.049(3) 0.072(4) -0.004(3) -0.012(3) 0.019(3) 
Cl1' 0.125(6) 0.107(5) 0.081(4) -0.012(4) 0.005(4) 0.059(5) 
Cl6 0.037(3) 0.046(3) 0.058(3) -0.008(2) -0.001(2) 0.016(3) 
C160 0.236(12) 0.212(12) 0.273(13) 0.001(9) -0.021(9) 0.116(9) 
C150 0.31(2) 0.29(2) 0.204(16) 0.060(14) 0.095(15) 0.26(2) 
C161 0.57(4) 0.57(4) 0.57(4) -0.001(10) 0.009(10) 0.28(2) 
C91 0.37(3) 0.172(16) 0.087(10) -0.052(10) -0.008(13) -0.092(18) 
C22 0.70(7) 0.30(3) 0.091(13) -0.006(15) -0.13(2) -0.07(3) 
C132 0.217(11) 0.224(12) 0.247(12) 0.016(8) -0.038(9) 0.110(9) 
C165 0.177(19) 0.177(19) 0.38(6) 0.000 0.000 0.089(10) 
N34 0.67(7) 0.54(6) 1.12(12) 0.45(7) 0.49(8) 0.56(6) 
 
_geom_special_details 
; 
 All esds (except the esd in the dihedral angle between two l.s. planes) 
 are estimated using the full covariance matrix.  The cell esds are taken 
 into account individually in the estimation of esds in distances, angles 
 and torsion angles; correlations between esds in cell parameters are only 
 used when they are defined by crystal symmetry.  An approximate (isotropic) 
 treatment of cell esds is used for estimating esds involving l.s. planes. 
; 
 
loop_ 
 _geom_bond_atom_site_label_1 
 _geom_bond_atom_site_label_2 
 _geom_bond_distance 
 _geom_bond_site_symmetry_2 
 _geom_bond_publ_flag 
C10 O21 1.385(11) . ? 
C12 C33 1.3900 . ? 
C12 C106 1.3900 . ? 
C12 O12 1.401(5) . ? 
C33 C44 1.3900 . ? 
C33 C123 1.521(7) . ? 
C44 C24 1.3900 . ? 
C24 C2 1.3900 . ? 
C24 C35 1.462(7) . ? 
C2 O11 1.384(5) . ? 
C2 C106 1.3900 . ? 
C4 C38 1.3900 . ? 
C4 C34 1.3900 . ? 
C4 N10 1.425(6) . ? 
C38 C5 1.3900 . ? 
C5 C116 1.3900 . ? 
C5 N11 1.451(6) . ? 
C116 O16 1.387(6) . ? 
C116 C16 1.3900 . ? 
C16 C34 1.3900 . ? 
C16 C113 1.550(11) . ? 
C34 O15 1.358(5) . ? 
C15 O17 1.387(9) . ? 
C15 C73 1.516(10) . ? 
C17 O3 1.369(7) . ? 
C17 C130 1.3900 . ? 
C17 C53 1.3900 . ? 
C130 C37 1.3900 . ? 
C130 C46 1.458(12) 3_675 ? 
C37 C96 1.3900 . ? 
C96 C3 1.3900 . ? 
C96 C25 1.522(9) . ? 
C3 C53 1.3900 . ? 
C3 O2 1.409(7) . ? 
C1 N1 1.383(8) . ? 
C1 C67 1.3900 . ? 
C1 C48 1.3900 . ? 
C67 C23 1.3900 . ? 
C67 O4 1.416(6) . ? 
C23 C118 1.3900 . ? 
C23 C86 1.550(8) . ? 
C118 C13 1.3900 . ? 
C118 O5 1.406(6) . ? 
C13 N3 1.389(7) . ? 
C13 C48 1.3900 . ? 
C21 C92 1.3900 . ? 
C21 C125 1.3900 . ? 
C92 O17 1.346(6) . ? 
C92 C19 1.3900 . ? 
C19 C70 1.3900 . ? 
C19 C126 1.534(15) . ? 
C70 C18 1.3900 . ? 
C18 C125 1.3900 . ? 
C18 C79 1.593(8) . ? 
C125 O18 1.336(5) . ? 
C82 C7 1.3900 . ? 
C82 C14 1.3900 . ? 
C82 N9 1.404(7) . ? 
C7 C77 1.3900 . ? 
C77 C8 1.3900 . ? 
C77 N7 1.384(7) 3_675 ? 
C8 C6 1.3900 . ? 
C8 O21 1.390(7) . ? 
C6 C14 1.3900 . ? 
C6 C57 1.503(8) . ? 
C14 O22 1.426(6) . ? 
C25 O1 1.211(9) . ? 
C25 N1 1.358(9) . ? 
C29 O12 1.453(8) . ? 
C29 C64 1.477(10) . ? 
C31 O25 1.474(10) . ? 
C31 C39 1.543(13) . ? 
C32 O25 1.345(8) . ? 
C32 C58 1.377(9) 2_865 ? 
C32 C36 1.394(9) . ? 
C35 O10 1.277(8) . ? 
C35 N10 1.358(8) . ? 
C36 C45 1.407(9) . ? 
C39 C108 1.471(14) . ? 
C43 O11 1.408(8) . ? 
C43 C122 1.504(10) . ? 
C45 O28 1.367(8) . ? 
C45 C76 1.395(9) . ? 
C46 O6 1.323(10) . ? 
C46 N3 1.381(11) . ? 
C46 C130 1.46(3) 2_765 ? 
C49 O26 1.261(9) . ? 
C49 N5 1.307(10) . ? 
C49 C58 1.462(11) . ? 
C51 C69 1.415(11) . ? 
C51 C90 1.496(10) . ? 
C52 C75 1.586(12) . ? 
C55 O2 1.386(10) . ? 
C55 C97 1.433(12) . ? 
C56 O27 1.158(9) . ? 
C56 N6 1.418(8) . ? 
C56 C110 1.504(10) . ? 
C57 O23 1.206(10) . ? 
C57 N8 1.385(8) . ? 
C58 C32 1.377(9) 3_785 ? 
C58 C59 1.396(11) 3_785 ? 
C59 C58 1.396(11) 2_865 ? 
C59 C76 1.398(10) . ? 
C60 O3 1.402(11) . ? 
C60 C47 1.431(13) . ? 
C62 C95 1.412(10) . ? 
C62 C127 1.535(10) . ? 
C62 C122 1.627(9) . ? 
C64 C75 1.544(8) . ? 
C68 O16 1.435(10) . ? 
C69 C20 1.547(12) . ? 
C69 C112 1.610(12) . ? 
O30 C86 1.277(9) . ? 
C73 C93 1.586(11) . ? 
C74 N8 1.488(7) . ? 
C74 C83 1.535(8) . ? 
C74 C63 1.541(6) . ? 
C75 C99 1.545(8) . ? 
C76 C121 1.499(10) . ? 
C79 O20 1.158(9) . ? 
C79 N9 1.370(10) . ? 
O14 C113 1.212(13) . ? 
C84 C27 1.506(16) . ? 
C84 C50 1.517(14) . ? 
C84 C97 1.608(14) . ? 
C86 N2 1.259(9) . ? 
C87 O4 1.465(10) . ? 
C90 O18 1.474(7) . ? 
C93 C100 1.448(12) . ? 
C93 C120 1.535(11) . ? 
C98 C9 1.3900 . ? 
C98 C30 1.3900 . ? 
C98 N4 1.454(7) . ? 
C9 O7 1.362(7) . ? 
C9 C110 1.3900 . ? 
C110 C28 1.3900 . ? 
C28 O8 1.350(6) . ? 
C28 C40 1.3900 . ? 
C40 C30 1.3900 . ? 
C40 N5 1.454(6) . ? 
N6 C143 1.479(8) . ? 
C105 O5 1.409(10) . ? 
C113 N14 1.361(15) . ? 
C114 C85 1.341(13) . ? 
C114 C85' 1.339(18) . ? 
C114 O28 1.502(10) . ? 
C85 C103 1.542(8) . ? 
C85 C85' 1.68(2) . ? 
C85' C10' 1.90(6) . ? 
C85' C162 2.02(3) . ? 
C10' C162 1.08(7) . ? 
C10' C103 1.25(3) . ? 
C10' C135 1.77(7) . ? 
C103 C135 1.524(9) . ? 
C103 C162 1.98(3) . ? 
C121 O24 1.137(9) . ? 
C121 N4 1.313(9) . ? 
C123 O13 1.213(11) . ? 
C123 N11 1.338(8) 2_865 ? 
N2 C54 1.490(9) . ? 
C126 O19 1.340(14) . ? 
C126 N7 1.332(14) . ? 
C128 O22 1.371(9) . ? 
N7 C77 1.38(3) 2_765 ? 
N11 C123 1.338(8) 3_785 ? 
O7 C61 1.402(12) . ? 
O8 C109 1.389(10) . ? 
N14 C136 1.441(7) . ? 
O15 C81 1.522(12) . ? 
C11 C41 1.534(10) . ? 
C11 C47 1.566(10) . ? 
C11 C91 1.60(3) . ? 
C108 C145 1.37(3) . ? 
C108 C134 1.562(18) . ? 
C83 C22 1.536(9) . ? 
C83 C132 1.543(9) . ? 
C136 C151 1.533(9) . ? 
C136 C137 1.554(9) . ? 
N20 C156 1.314(11) . ? 
N20 C141 1.506(15) . ? 
N20 C140 1.582(16) . ? 
C143 C160 1.530(10) . ? 
C143 C144 1.554(9) . ? 
C151 C150 1.513(16) . ? 
C151 C157 1.521(9) . ? 
C156 O36 1.107(11) . ? 
N24 C164 1.472(7) . ? 
C148 C133 1.556(7) . ? 
C54 C102 1.493(19) . ? 
C54 C133 1.525(10) . ? 
C133 C154 1.538(7) . ? 
C147 C160 1.542(10) . ? 
C163 N30 1.416(9) 2_865 ? 
C163 N30 1.416(9) 3_785 ? 
C163 N30 1.416(9) . ? 
C155 N33 1.453(7) . ? 
C155 N33 1.453(7) 3_455 ? 
C155 N33 1.453(7) 2_565 ? 
C164 N24 1.472(7) 2_765 ? 
C164 N24 1.472(7) 3_675 ? 
Cl2' Cl2 1.466(14) . ? 
Cl2' Cl3 2.308(15) . ? 
Cl4 Cl' 1.68(2) . ? 
Cl4 Cl4' 2.11(3) . ? 
Cl4' Cl' 1.737(18) . ? 
C160 C161 1.556(10) . ? 
C165 N34 1.436(10) 2_765 ? 
C165 N34 1.436(10) . ? 
C165 N34 1.436(10) 3_675 ? 
 
loop_ 
 _geom_angle_atom_site_label_1 
 _geom_angle_atom_site_label_2 
 _geom_angle_atom_site_label_3 
 _geom_angle 
 _geom_angle_site_symmetry_1 
 _geom_angle_site_symmetry_3 
 _geom_angle_publ_flag 
C33 C12 C106 120.0 . . ? 
C33 C12 O12 118.7(4) . . ? 
C106 C12 O12 121.3(4) . . ? 
C12 C33 C44 120.0 . . ? 
C12 C33 C123 124.1(4) . . ? 
C44 C33 C123 115.4(4) . . ? 
C33 C44 C24 120.0 . . ? 
C2 C24 C44 120.0 . . ? 
C2 C24 C35 126.8(4) . . ? 
C44 C24 C35 113.2(4) . . ? 
O11 C2 C24 117.6(3) . . ? 
O11 C2 C106 122.4(3) . . ? 
C24 C2 C106 120.0 . . ? 
C2 C106 C12 120.0 . . ? 
C38 C4 C34 120.0 . . ? 
C38 C4 N10 123.3(3) . . ? 
C34 C4 N10 116.5(3) . . ? 
C4 C38 C5 120.0 . . ? 
C38 C5 C116 120.0 . . ? 
C38 C5 N11 122.4(3) . . ? 
C116 C5 N11 117.6(3) . . ? 
O16 C116 C5 117.1(3) . . ? 
O16 C116 C16 122.9(3) . . ? 
C5 C116 C16 120.0 . . ? 
C116 C16 C34 120.0 . . ? 
C116 C16 C113 120.8(5) . . ? 
C34 C16 C113 119.1(4) . . ? 
O15 C34 C16 122.1(4) . . ? 
O15 C34 C4 117.9(4) . . ? 
C16 C34 C4 120.0 . . ? 
O17 C15 C73 107.8(7) . . ? 
O3 C17 C130 117.5(4) . . ? 
O3 C17 C53 122.5(4) . . ? 
C130 C17 C53 120.0 . . ? 
C37 C130 C17 120.0 . . ? 
C37 C130 C46 113.9(5) . 3_675 ? 
C17 C130 C46 125.9(5) . 3_675 ? 
C130 C37 C96 120.0 . . ? 
C3 C96 C37 120.0 . . ? 
C3 C96 C25 127.5(4) . . ? 
C37 C96 C25 112.5(4) . . ? 
C96 C3 C53 120.0 . . ? 
C96 C3 O2 117.2(4) . . ? 
C53 C3 O2 122.8(4) . . ? 
C3 C53 C17 120.0 . . ? 
N1 C1 C67 118.8(4) . . ? 
N1 C1 C48 121.1(4) . . ? 
C67 C1 C48 120.0 . . ? 
C1 C67 C23 120.0 . . ? 
C1 C67 O4 120.1(4) . . ? 
C23 C67 O4 119.8(4) . . ? 
C118 C23 C67 120.0 . . ? 
C118 C23 C86 120.4(5) . . ? 
C67 C23 C86 119.3(4) . . ? 
C23 C118 C13 120.0 . . ? 
C23 C118 O5 121.6(4) . . ? 
C13 C118 O5 118.4(4) . . ? 
N3 C13 C118 117.0(4) . . ? 
N3 C13 C48 123.0(4) . . ? 
C118 C13 C48 120.0 . . ? 
C13 C48 C1 120.0 . . ? 
C92 C21 C125 120.0 . . ? 
O17 C92 C19 116.9(4) . . ? 
O17 C92 C21 123.1(4) . . ? 
C19 C92 C21 120.0 . . ? 
C92 C19 C70 120.0 . . ? 
C92 C19 C126 129.4(6) . . ? 
C70 C19 C126 110.6(6) . . ? 
C18 C70 C19 120.0 . . ? 
C70 C18 C125 120.0 . . ? 
C70 C18 C79 111.4(4) . . ? 
C125 C18 C79 128.5(4) . . ? 
O18 C125 C18 117.0(4) . . ? 
O18 C125 C21 123.0(4) . . ? 
C18 C125 C21 120.0 . . ? 
C7 C82 C14 120.0 . . ? 
C7 C82 N9 122.5(4) . . ? 
C14 C82 N9 117.0(4) . . ? 
C82 C7 C77 120.0 . . ? 
C8 C77 C7 120.0 . . ? 
C8 C77 N7 117.8(4) . 3_675 ? 
C7 C77 N7 122.2(4) . 3_675 ? 
C77 C8 C6 120.0 . . ? 
C77 C8 O21 118.8(4) . . ? 
C6 C8 O21 121.2(4) . . ? 
C14 C6 C8 120.0 . . ? 
C14 C6 C57 117.5(4) . . ? 
C8 C6 C57 122.4(4) . . ? 
C6 C14 C82 120.0 . . ? 
C6 C14 O22 120.5(4) . . ? 
C82 C14 O22 119.4(4) . . ? 
O1 C25 N1 117.0(8) . . ? 
O1 C25 C96 122.1(7) . . ? 
N1 C25 C96 120.9(7) . . ? 
O12 C29 C64 106.6(5) . . ? 
O25 C31 C39 103.6(7) . . ? 
O25 C32 C58 117.5(7) . 2_865 ? 
O25 C32 C36 121.3(7) . . ? 
C58 C32 C36 121.1(7) 2_865 . ? 
O10 C35 N10 121.2(6) . . ? 
O10 C35 C24 118.0(6) . . ? 
N10 C35 C24 120.9(5) . . ? 
C32 C36 C45 120.9(6) . . ? 
C108 C39 C31 113.3(11) . . ? 
O11 C43 C122 107.7(6) . . ? 
O28 C45 C76 115.6(6) . . ? 
O28 C45 C36 123.7(6) . . ? 
C76 C45 C36 120.7(6) . . ? 
O6 C46 N3 119.3(10) . . ? 
O6 C46 C130 119.7(8) . 2_765 ? 
N3 C46 C130 120.9(7) . 2_765 ? 
O26 C49 N5 123.7(8) . . ? 
O26 C49 C58 115.4(8) . . ? 
N5 C49 C58 120.7(7) . . ? 
C69 C51 C90 114.4(7) . . ? 
O2 C55 C97 109.8(8) . . ? 
O27 C56 N6 120.3(9) . . ? 
O27 C56 C110 128.3(7) . . ? 
N6 C56 C110 111.5(7) . . ? 
O23 C57 N8 122.2(7) . . ? 
O23 C57 C6 123.9(7) . . ? 
N8 C57 C6 113.4(7) . . ? 
C32 C58 C59 115.1(6) 3_785 3_785 ? 
C32 C58 C49 127.1(7) 3_785 . ? 
C59 C58 C49 117.6(6) 3_785 . ? 
C58 C59 C76 127.4(7) 2_865 . ? 
O3 C60 C47 115.3(8) . . ? 
C95 C62 C127 115.6(7) . . ? 
C95 C62 C122 112.5(6) . . ? 
C127 C62 C122 107.1(6) . . ? 
C29 C64 C75 113.8(6) . . ? 
C51 C69 C20 111.7(8) . . ? 
C51 C69 C112 112.1(7) . . ? 
C20 C69 C112 103.8(7) . . ? 
C15 C73 C93 111.7(7) . . ? 
N8 C74 C83 107.4(8) . . ? 
N8 C74 C63 112.2(8) . . ? 
C83 C74 C63 108.8(7) . . ? 
C64 C75 C99 107.6(7) . . ? 
C64 C75 C52 110.3(7) . . ? 
C99 C75 C52 109.6(7) . . ? 
C45 C76 C59 114.5(6) . . ? 
C45 C76 C121 129.3(6) . . ? 
C59 C76 C121 116.2(7) . . ? 
O20 C79 N9 123.8(7) . . ? 
O20 C79 C18 120.5(7) . . ? 
N9 C79 C18 115.1(7) . . ? 
C27 C84 C50 107.0(9) . . ? 
C27 C84 C97 118.4(10) . . ? 
C50 C84 C97 100.5(9) . . ? 
N2 C86 O30 124.7(8) . . ? 
N2 C86 C23 121.4(8) . . ? 
O30 C86 C23 113.8(6) . . ? 
O18 C90 C51 107.7(5) . . ? 
C100 C93 C120 110.6(8) . . ? 
C100 C93 C73 110.6(7) . . ? 
C120 C93 C73 108.5(8) . . ? 
C55 C97 C84 117.0(9) . . ? 
C9 C98 C30 120.0 . . ? 
C9 C98 N4 119.5(4) . . ? 
C30 C98 N4 120.4(4) . . ? 
O7 C9 C98 118.5(4) . . ? 
O7 C9 C110 121.5(4) . . ? 
C98 C9 C110 120.0 . . ? 
C28 C110 C9 120.0 . . ? 
C28 C110 C56 118.7(5) . . ? 
C9 C110 C56 119.1(5) . . ? 
O8 C28 C110 120.8(4) . . ? 
O8 C28 C40 119.2(4) . . ? 
C110 C28 C40 120.0 . . ? 
C28 C40 C30 120.0 . . ? 
C28 C40 N5 119.6(4) . . ? 
C30 C40 N5 120.4(4) . . ? 
C40 C30 C98 120.0 . . ? 
C56 N6 C143 114.8(8) . . ? 
O14 C113 N14 127.7(11) . . ? 
O14 C113 C16 117.9(13) . . ? 
N14 C113 C16 113.3(9) . . ? 
C85 C114 C85' 77.7(13) . . ? 
C85 C114 O28 113.4(8) . . ? 
C85' C114 O28 111.7(13) . . ? 
C114 C85 C103 109.8(9) . . ? 
C114 C85 C85' 51.1(10) . . ? 
C103 C85 C85' 86.0(12) . . ? 
C114 C85' C85 51.2(8) . . ? 
C114 C85' C10' 114.1(16) . . ? 
C85 C85' C10' 72.8(18) . . ? 
C114 C85' C162 124.1(19) . . ? 
C85 C85' C162 99.8(14) . . ? 
C10' C85' C162 32(2) . . ? 
C162 C10' C103 117(6) . . ? 
C162 C10' C135 144(4) . . ? 
C103 C10' C135 57(2) . . ? 
C162 C10' C85' 80(4) . . ? 
C103 C10' C85' 86(2) . . ? 
C135 C10' C85' 130(2) . . ? 
C10' C103 C135 79(3) . . ? 
C10' C103 C85 99(2) . . ? 
C135 C103 C85 114.3(9) . . ? 
C10' C103 C162 29(4) . . ? 
C135 C103 C162 100.8(15) . . ? 
C85 C103 C162 106.8(11) . . ? 
C103 C135 C10' 43.7(12) . . ? 
O24 C121 N4 121.1(8) . . ? 
O24 C121 C76 121.5(7) . . ? 
N4 C121 C76 117.3(7) . . ? 
C43 C122 C62 112.5(6) . . ? 
O13 C123 N11 121.9(7) . 2_865 ? 
O13 C123 C33 114.8(7) . . ? 
N11 C123 C33 119.4(6) 2_865 . ? 
C86 N2 C54 127.3(9) . . ? 
O19 C126 N7 113.9(12) . . ? 
O19 C126 C19 116.3(10) . . ? 
N7 C126 C19 121.5(11) . . ? 
C25 N1 C1 128.7(6) . . ? 
C46 N3 C13 127.9(7) . . ? 
C121 N4 C98 127.9(6) . . ? 
C49 N5 C40 125.2(6) . . ? 
C35 N10 C4 127.4(5) . . ? 
C126 N7 C77 127.5(8) . 2_765 ? 
C123 N11 C5 123.0(5) 3_785 . ? 
C79 N9 C82 125.2(6) . . ? 
C57 N8 C74 123.4(7) . . ? 
C55 O2 C3 118.8(7) . . ? 
C17 O3 C60 122.9(7) . . ? 
C67 O4 C87 111.7(5) . . ? 
C118 O5 C105 113.9(6) . . ? 
C9 O7 C61 120.1(6) . . ? 
C28 O8 C109 117.1(6) . . ? 
C2 O11 C43 119.5(5) . . ? 
C12 O12 C29 118.7(5) . . ? 
C113 N14 C136 115.9(8) . . ? 
C34 O15 C81 115.7(7) . . ? 
C116 O16 C68 114.2(6) . . ? 
C92 O17 C15 119.8(5) . . ? 
C125 O18 C90 119.1(5) . . ? 
C10 O21 C8 118.9(7) . . ? 
C128 O22 C14 111.8(5) . . ? 
C32 O25 C31 118.5(6) . . ? 
C45 O28 C114 117.9(6) . . ? 
C41 C11 C47 97.3(8) . . ? 
C41 C11 C91 83.4(13) . . ? 
C47 C11 C91 90.3(12) . . ? 
C145 C108 C39 129.5(18) . . ? 
C145 C108 C134 120.5(17) . . ? 
C39 C108 C134 104.2(11) . . ? 
C74 C83 C22 109.1(8) . . ? 
C74 C83 C132 107.4(13) . . ? 
C22 C83 C132 128.6(18) . . ? 
N14 C136 C151 101.3(7) . . ? 
N14 C136 C137 110.9(7) . . ? 
C151 C136 C137 104.2(11) . . ? 
C156 N20 C141 118.9(9) . . ? 
C156 N20 C140 126.6(11) . . ? 
C141 N20 C140 114.3(9) . . ? 
N6 C143 C160 107.2(12) . . ? 
N6 C143 C144 112.4(8) . . ? 
C160 C143 C144 112.8(9) . . ? 
C150 C151 C157 118.6(13) . . ? 
C150 C151 C136 109.4(11) . . ? 
C157 C151 C136 107.5(8) . . ? 
O36 C156 N20 119.2(12) . . ? 
C102 C54 N2 122.3(12) . . ? 
C102 C54 C133 96.6(11) . . ? 
N2 C54 C133 100.4(13) . . ? 
C54 C133 C154 118.4(19) . . ? 
C54 C133 C148 108.6(8) . . ? 
C154 C133 C148 107.3(8) . . ? 
C60 C47 C11 102.9(10) . . ? 
C10' C162 C103 34(2) . . ? 
C10' C162 C85' 68(3) . . ? 
C103 C162 C85' 66.7(11) . . ? 
N30 C163 N30 119.6(3) 2_865 3_785 ? 
N30 C163 N30 119.6(3) 2_865 . ? 
N30 C163 N30 119.6(3) 3_785 . ? 
N33 C155 N33 119.97(5) . 3_455 ? 
N33 C155 N33 119.97(5) . 2_565 ? 
N33 C155 N33 119.97(5) 3_455 2_565 ? 
N24 C164 N24 119.83(10) 2_765 . ? 
N24 C164 N24 119.83(10) 2_765 3_675 ? 
N24 C164 N24 119.83(10) . 3_675 ? 
Cl2 Cl2' Cl3 123.4(11) . . ? 
Cl' Cl4 Cl4' 53.0(10) . . ? 
Cl' Cl4' Cl4 50.6(8) . . ? 
Cl4 Cl' Cl4' 76.4(11) . . ? 
C143 C160 C147 106.6(9) . . ? 
C143 C160 C161 134(2) . . ? 
C147 C160 C161 106.6(9) . . ? 
N34 C165 N34 119.99(4) 2_765 . ? 
N34 C165 N34 119.99(5) 2_765 3_675 ? 
N34 C165 N34 119.99(4) . 3_675 ? 
 
_diffrn_measured_fraction_theta_max    0.988 
_diffrn_reflns_theta_full              27.69 
_diffrn_measured_fraction_theta_full   0.988 
_refine_diff_density_max    0.978 
_refine_diff_density_min   -0.340 
_refine_diff_density_rms    0.084 

# SQUEEZE RESULTS (APPEND TO CIF)
loop_
  _platon_squeeze_void_nr
  _platon_squeeze_void_average_x
  _platon_squeeze_void_average_y
  _platon_squeeze_void_average_z
  _platon_squeeze_void_volume
  _platon_squeeze_void_count_electrons
         1     0.000     0.000     0.174     451.8      57.4
         2     0.000     0.000     0.363     193.5      24.6
         3     0.134    -0.088     0.640     158.5      21.6
         4     0.502     0.045     0.744      48.4       5.5
         5     0.000     0.000     0.805     439.3      50.7
         6     0.000     0.000     0.933     392.5      38.0
         7     0.250     0.015     0.148       8.8       0.2
         8     0.667     0.333     0.138     433.8      50.9
         9     0.445     0.200     0.973     156.8      21.9
        10     0.289     0.124     0.410      46.9       5.4
        11     0.876     0.165     0.410      47.0       5.4
        12     0.705     0.076     0.637       6.7       0.3
        13     0.800     0.246     0.973     156.4      22.1
        14     0.432     0.083     0.482       7.5       0.3
        15     0.088     0.221     0.640     158.2      21.7
        16     0.667     0.333     0.266     389.0      38.7
        17     0.667     0.333     0.507     447.4      57.4
        18     0.667     0.333     0.696     190.4      24.6
        19     0.985     0.235     0.148       8.8       0.2
        20     0.258     0.295     0.303       7.6       0.4
        21     0.371     0.295     0.637       6.7       0.3
        22     0.168     0.378     0.077      48.2       5.5
        23     0.917     0.348     0.482       7.3       0.3
        24     0.333     0.667     0.471     436.0      50.4
        25     0.112     0.533     0.307     154.1      22.0
        26     0.467     0.579     0.307     153.9      22.0
        27     0.955     0.457     0.744      48.1       5.5
        28     0.543     0.498     0.744      47.9       5.5
        29     0.371     0.409     0.970       6.9       0.4
        30     0.098     0.417     0.815       7.3       0.2
        31     0.754     0.555     0.973     155.8      21.9
        32     0.333     0.667     0.599     388.7      38.4
        33     0.333     0.667     0.030     190.1      24.7
        34     0.333     0.667     0.841     449.3      57.5
        35     0.651     0.568     0.482       7.4       0.3
        36     0.924     0.629     0.637       6.7       0.3
        37     0.038     0.629     0.970       6.9       0.3
        38     0.835     0.711     0.410      47.1       5.4
        39     0.583     0.682     0.815       7.5       0.3
        40     0.779     0.866     0.640     158.5      21.7
        41     0.622     0.790     0.077      48.1       5.5
        42     0.209     0.831     0.077      48.2       5.5
        43     0.038     0.742     0.303       7.6       0.4
        44     0.765     0.750     0.148       8.8       0.2
        45     0.421     0.888     0.307     153.9      22.0
        46     0.318     0.901     0.815       7.5       0.3
        47     0.705     0.962     0.303       7.5       0.4
        48     0.591     0.962     0.970       6.9       0.3
_platon_squeeze_details
; 
;
